# Supplementary material
Source: ML conference proceedings conference paper supplement (https://proceedings.neurips.cc/paper_files/paper/2020/hash/d1e7b08bdb7783ed4fb10abe92c22ffd-Abstract.html)
Supplement: Supplementary file 2 [file d1e7b08bdb7783ed4fb10abe92c22ffd-Supplemental.zip]

Archive with 248 entries (227 files):
- supplementary_materials/
- supplementary_materials/DirPG_code/
- supplementary_materials/DirPG_code/run.py
- __MACOSX/
- __MACOSX/supplementary_materials/
- __MACOSX/supplementary_materials/DirPG_code/
- __MACOSX/supplementary_materials/DirPG_code/._run.py
- supplementary_materials/DirPG_code/top-down_sampling_introduction.ipynb
- __MACOSX/supplementary_materials/DirPG_code/._top-down_sampling_introduction.ipynb
- supplementary_materials/DirPG_code/.DS_Store
- __MACOSX/supplementary_materials/DirPG_code/._.DS_Store
- supplementary_materials/DirPG_code/requirements.txt
- __MACOSX/supplementary_materials/DirPG_code/._requirements.txt
- supplementary_materials/DirPG_code/__init__.py
- __MACOSX/supplementary_materials/DirPG_code/.___init__.py
- supplementary_materials/DirPG_code/DeepSea.ipynb
- __MACOSX/supplementary_materials/DirPG_code/._DeepSea.ipynb
- supplementary_materials/DirPG_code/README.md
- __MACOSX/supplementary_materials/DirPG_code/._README.md
- supplementary_materials/DirPG_code/saved_models/
- supplementary_materials/DirPG_code/saved_models/policy_state_dicts_multiroom.pkl
- __MACOSX/supplementary_materials/DirPG_code/saved_models/
- __MACOSX/supplementary_materials/DirPG_code/saved_models/._policy_state_dicts_multiroom.pkl
- __MACOSX/supplementary_materials/DirPG_code/._saved_models
- supplementary_materials/DirPG_code/logs/
- supplementary_materials/DirPG_code/logs/.DS_Store
- __MACOSX/supplementary_materials/DirPG_code/logs/
- __MACOSX/supplementary_materials/DirPG_code/logs/._.DS_Store
- __MACOSX/supplementary_materials/DirPG_code/._logs
- supplementary_materials/DirPG_code/scripts/
- supplementary_materials/DirPG_code/scripts/.DS_Store
- __MACOSX/supplementary_materials/DirPG_code/scripts/
- __MACOSX/supplementary_materials/DirPG_code/scripts/._.DS_Store
- supplementary_materials/DirPG_code/scripts/reinforce.py
- __MACOSX/supplementary_materials/DirPG_code/scripts/._reinforce.py
- supplementary_materials/DirPG_code/scripts/direct_astar.py
- __MACOSX/supplementary_materials/DirPG_code/scripts/._direct_astar.py
- supplementary_materials/DirPG_code/scripts/__init__.py
- __MACOSX/supplementary_materials/DirPG_code/scripts/.___init__.py
- supplementary_materials/DirPG_code/scripts/__pycache__/
- supplementary_materials/DirPG_code/scripts/__pycache__/search_cross_entropy.cpython-37.pyc
- __MACOSX/supplementary_materials/DirPG_code/scripts/__pycache__/
- __MACOSX/supplementary_materials/DirPG_code/scripts/__pycache__/._search_cross_entropy.cpython-37.pyc
- supplementary_materials/DirPG_code/scripts/__pycache__/policy_model.cpython-36.pyc
- __MACOSX/supplementary_materials/DirPG_code/scripts/__pycache__/._policy_model.cpython-36.pyc
- supplementary_materials/DirPG_code/scripts/__pycache__/policy_model.cpython-37.pyc
- __MACOSX/supplementary_materials/DirPG_code/scripts/__pycache__/._policy_model.cpython-37.pyc
- supplementary_materials/DirPG_code/scripts/__pycache__/reinforce.cpython-37.pyc
- __MACOSX/supplementary_materials/DirPG_code/scripts/__pycache__/._reinforce.cpython-37.pyc
- supplementary_materials/DirPG_code/scripts/__pycache__/reinforce_baseline.cpython-37.pyc
- __MACOSX/supplementary_materials/DirPG_code/scripts/__pycache__/._reinforce_baseline.cpython-37.pyc
- supplementary_materials/DirPG_code/scripts/__pycache__/reinforce.cpython-36.pyc
- __MACOSX/supplementary_materials/DirPG_code/scripts/__pycache__/._reinforce.cpython-36.pyc
- supplementary_materials/DirPG_code/scripts/__pycache__/direct_astar.cpython-36.pyc
- __MACOSX/supplementary_materials/DirPG_code/scripts/__pycache__/._direct_astar.cpython-36.pyc
- supplementary_materials/DirPG_code/scripts/__pycache__/direct_astar.cpython-37.pyc
- __MACOSX/supplementary_materials/DirPG_code/scripts/__pycache__/._direct_astar.cpython-37.pyc
- supplementary_materials/DirPG_code/scripts/__pycache__/direct_astar_alternative.cpython-37.pyc
- __MACOSX/supplementary_materials/DirPG_code/scripts/__pycache__/._direct_astar_alternative.cpython-37.pyc
- supplementary_materials/DirPG_code/scripts/__pycache__/utils.cpython-36.pyc
- __MACOSX/supplementary_materials/DirPG_code/scripts/__pycache__/._utils.cpython-36.pyc
- supplementary_materials/DirPG_code/scripts/__pycache__/utils.cpython-37.pyc
- __MACOSX/supplementary_materials/DirPG_code/scripts/__pycache__/._utils.cpython-37.pyc
- supplementary_materials/DirPG_code/scripts/__pycache__/__init__.cpython-36.pyc
- __MACOSX/supplementary_materials/DirPG_code/scripts/__pycache__/.___init__.cpython-36.pyc
- supplementary_materials/DirPG_code/scripts/__pycache__/__init__.cpython-37.pyc
- __MACOSX/supplementary_materials/DirPG_code/scripts/__pycache__/.___init__.cpython-37.pyc
- supplementary_materials/DirPG_code/scripts/__pycache__/plots.cpython-37.pyc
- __MACOSX/supplementary_materials/DirPG_code/scripts/__pycache__/._plots.cpython-37.pyc
- supplementary_materials/DirPG_code/scripts/__pycache__/minigrid_rl.cpython-36.pyc
- __MACOSX/supplementary_materials/DirPG_code/scripts/__pycache__/._minigrid_rl.cpython-36.pyc
- supplementary_materials/DirPG_code/scripts/__pycache__/minigrid_rl.cpython-37.pyc
- __MACOSX/supplementary_materials/DirPG_code/scripts/__pycache__/._minigrid_rl.cpython-37.pyc
- __MACOSX/supplementary_materials/DirPG_code/scripts/.___pycache__
- supplementary_materials/DirPG_code/scripts/minigrid_rl.py
- __MACOSX/supplementary_materials/DirPG_code/scripts/._minigrid_rl.py
- supplementary_materials/DirPG_code/scripts/plots.py
- __MACOSX/supplementary_materials/DirPG_code/scripts/._plots.py
- supplementary_materials/DirPG_code/scripts/utils.py
- __MACOSX/supplementary_materials/DirPG_code/scripts/._utils.py
- supplementary_materials/DirPG_code/scripts/policy_model.py
- __MACOSX/supplementary_materials/DirPG_code/scripts/._policy_model.py
- __MACOSX/supplementary_materials/DirPG_code/._scripts
- supplementary_materials/DirPG_code/gym_minigrid/
- supplementary_materials/DirPG_code/gym_minigrid/roomgrid.py
- __MACOSX/supplementary_materials/DirPG_code/gym_minigrid/
- __MACOSX/supplementary_materials/DirPG_code/gym_minigrid/._roomgrid.py
- supplementary_materials/DirPG_code/gym_minigrid/.DS_Store
- __MACOSX/supplementary_materials/DirPG_code/gym_minigrid/._.DS_Store
- supplementary_materials/DirPG_code/gym_minigrid/rendering.py
- __MACOSX/supplementary_materials/DirPG_code/gym_minigrid/._rendering.py
- supplementary_materials/DirPG_code/gym_minigrid/register.py
- __MACOSX/supplementary_materials/DirPG_code/gym_minigrid/._register.py
- supplementary_materials/DirPG_code/gym_minigrid/__init__.py
- __MACOSX/supplementary_materials/DirPG_code/gym_minigrid/.___init__.py
- supplementary_materials/DirPG_code/gym_minigrid/minigrid.py
- __MACOSX/supplementary_materials/DirPG_code/gym_minigrid/._minigrid.py
- supplementary_materials/DirPG_code/gym_minigrid/__pycache__/
- supplementary_materials/DirPG_code/gym_minigrid/__pycache__/register.cpython-37.pyc
- __MACOSX/supplementary_materials/DirPG_code/gym_minigrid/__pycache__/
- __MACOSX/supplementary_materials/DirPG_code/gym_minigrid/__pycache__/._register.cpython-37.pyc
- supplementary_materials/DirPG_code/gym_minigrid/__pycache__/register.cpython-36.pyc
- __MACOSX/supplementary_materials/DirPG_code/gym_minigrid/__pycache__/._register.cpython-36.pyc
- supplementary_materials/DirPG_code/gym_minigrid/__pycache__/rendering.cpython-37.pyc
- __MACOSX/supplementary_materials/DirPG_code/gym_minigrid/__pycache__/._rendering.cpython-37.pyc
- supplementary_materials/DirPG_code/gym_minigrid/__pycache__/rendering.cpython-36.pyc
- __MACOSX/supplementary_materials/DirPG_code/gym_minigrid/__pycache__/._rendering.cpython-36.pyc
- supplementary_materials/DirPG_code/gym_minigrid/__pycache__/roomgrid.cpython-37.pyc
- __MACOSX/supplementary_materials/DirPG_code/gym_minigrid/__pycache__/._roomgrid.cpython-37.pyc
- supplementary_materials/DirPG_code/gym_minigrid/__pycache__/roomgrid.cpython-36.pyc
- __MACOSX/supplementary_materials/DirPG_code/gym_minigrid/__pycache__/._roomgrid.cpython-36.pyc
- supplementary_materials/DirPG_code/gym_minigrid/__pycache__/wrappers.cpython-36.pyc
- __MACOSX/supplementary_materials/DirPG_code/gym_minigrid/__pycache__/._wrappers.cpython-36.pyc
- supplementary_materials/DirPG_code/gym_minigrid/__pycache__/wrappers.cpython-37.pyc
- __MACOSX/supplementary_materials/DirPG_code/gym_minigrid/__pycache__/._wrappers.cpython-37.pyc
- supplementary_materials/DirPG_code/gym_minigrid/__pycache__/__init__.cpython-36.pyc
- __MACOSX/supplementary_materials/DirPG_code/gym_minigrid/__pycache__/.___init__.cpython-36.pyc
- supplementary_materials/DirPG_code/gym_minigrid/__pycache__/__init__.cpython-37.pyc
- __MACOSX/supplementary_materials/DirPG_code/gym_minigrid/__pycache__/.___init__.cpython-37.pyc
- supplementary_materials/DirPG_code/gym_minigrid/__pycache__/minigrid.cpython-36.pyc
- __MACOSX/supplementary_materials/DirPG_code/gym_minigrid/__pycache__/._minigrid.cpython-36.pyc
- supplementary_materials/DirPG_code/gym_minigrid/__pycache__/minigrid.cpython-37.pyc
- __MACOSX/supplementary_materials/DirPG_code/gym_minigrid/__pycache__/._minigrid.cpython-37.pyc
- __MACOSX/supplementary_materials/DirPG_code/gym_minigrid/.___pycache__
- supplementary_materials/DirPG_code/gym_minigrid/wrappers.py
- __MACOSX/supplementary_materials/DirPG_code/gym_minigrid/._wrappers.py
- supplementary_materials/DirPG_code/gym_minigrid/envs/
- supplementary_materials/DirPG_code/gym_minigrid/envs/fetch.py
- __MACOSX/supplementary_materials/DirPG_code/gym_minigrid/envs/
- __MACOSX/supplementary_materials/DirPG_code/gym_minigrid/envs/._fetch.py
- supplementary_materials/DirPG_code/gym_minigrid/envs/gotoobject.py
- __MACOSX/supplementary_materials/DirPG_code/gym_minigrid/envs/._gotoobject.py
- supplementary_materials/DirPG_code/gym_minigrid/envs/unlock.py
- __MACOSX/supplementary_materials/DirPG_code/gym_minigrid/envs/._unlock.py
- supplementary_materials/DirPG_code/gym_minigrid/envs/multiroom.py
- __MACOSX/supplementary_materials/DirPG_code/gym_minigrid/envs/._multiroom.py
- supplementary_materials/DirPG_code/gym_minigrid/envs/.DS_Store
- __MACOSX/supplementary_materials/DirPG_code/gym_minigrid/envs/._.DS_Store
- supplementary_materials/DirPG_code/gym_minigrid/envs/gotodoor.py
- __MACOSX/supplementary_materials/DirPG_code/gym_minigrid/envs/._gotodoor.py
- supplementary_materials/DirPG_code/gym_minigrid/envs/putnear.py
- __MACOSX/supplementary_materials/DirPG_code/gym_minigrid/envs/._putnear.py
- supplementary_materials/DirPG_code/gym_minigrid/envs/memory.py
- __MACOSX/supplementary_materials/DirPG_code/gym_minigrid/envs/._memory.py
- supplementary_materials/DirPG_code/gym_minigrid/envs/lockedroom.py
- __MACOSX/supplementary_materials/DirPG_code/gym_minigrid/envs/._lockedroom.py
- supplementary_materials/DirPG_code/gym_minigrid/envs/empty.py
- __MACOSX/supplementary_materials/DirPG_code/gym_minigrid/envs/._empty.py
- supplementary_materials/DirPG_code/gym_minigrid/envs/__init__.py
- __MACOSX/supplementary_materials/DirPG_code/gym_minigrid/envs/.___init__.py
- supplementary_materials/DirPG_code/gym_minigrid/envs/blockedunlockpickup.py
- __MACOSX/supplementary_materials/DirPG_code/gym_minigrid/envs/._blockedunlockpickup.py
- supplementary_materials/DirPG_code/gym_minigrid/envs/__pycache__/
- supplementary_materials/DirPG_code/gym_minigrid/envs/__pycache__/unlockpickup.cpython-37.pyc
- __MACOSX/supplementary_materials/DirPG_code/gym_minigrid/envs/__pycache__/
- __MACOSX/supplementary_materials/DirPG_code/gym_minigrid/envs/__pycache__/._unlockpickup.cpython-37.pyc
- supplementary_materials/DirPG_code/gym_minigrid/envs/__pycache__/unlockpickup.cpython-36.pyc
- __MACOSX/supplementary_materials/DirPG_code/gym_minigrid/envs/__pycache__/._unlockpickup.cpython-36.pyc
- supplementary_materials/DirPG_code/gym_minigrid/envs/__pycache__/keycorridor.cpython-37.pyc
- __MACOSX/supplementary_materials/DirPG_code/gym_minigrid/envs/__pycache__/._keycorridor.cpython-37.pyc
- supplementary_materials/DirPG_code/gym_minigrid/envs/__pycache__/gotodoor.cpython-36.pyc
- __MACOSX/supplementary_materials/DirPG_code/gym_minigrid/envs/__pycache__/._gotodoor.cpython-36.pyc
- supplementary_materials/DirPG_code/gym_minigrid/envs/__pycache__/gotodoor.cpython-37.pyc
- __MACOSX/supplementary_materials/DirPG_code/gym_minigrid/envs/__pycache__/._gotodoor.cpython-37.pyc
- supplementary_materials/DirPG_code/gym_minigrid/envs/__pycache__/keycorridor.cpython-36.pyc
- __MACOSX/supplementary_materials/DirPG_code/gym_minigrid/envs/__pycache__/._keycorridor.cpython-36.pyc
- supplementary_materials/DirPG_code/gym_minigrid/envs/__pycache__/lockedroom.cpython-36.pyc
- __MACOSX/supplementary_materials/DirPG_code/gym_minigrid/envs/__pycache__/._lockedroom.cpython-36.pyc
- supplementary_materials/DirPG_code/gym_minigrid/envs/__pycache__/obstructedmaze.cpython-37.pyc
- __MACOSX/supplementary_materials/DirPG_code/gym_minigrid/envs/__pycache__/._obstructedmaze.cpython-37.pyc
- supplementary_materials/DirPG_code/gym_minigrid/envs/__pycache__/obstructedmaze.cpython-36.pyc
- __MACOSX/supplementary_materials/DirPG_code/gym_minigrid/envs/__pycache__/._obstructedmaze.cpython-36.pyc
- supplementary_materials/DirPG_code/gym_minigrid/envs/__pycache__/lockedroom.cpython-37.pyc
- __MACOSX/supplementary_materials/DirPG_code/gym_minigrid/envs/__pycache__/._lockedroom.cpython-37.pyc
- supplementary_materials/DirPG_code/gym_minigrid/envs/__pycache__/fourrooms.cpython-36.pyc
- __MACOSX/supplementary_materials/DirPG_code/gym_minigrid/envs/__pycache__/._fourrooms.cpython-36.pyc
- supplementary_materials/DirPG_code/gym_minigrid/envs/__pycache__/fourrooms.cpython-37.pyc
- __MACOSX/supplementary_materials/DirPG_code/gym_minigrid/envs/__pycache__/._fourrooms.cpython-37.pyc
- supplementary_materials/DirPG_code/gym_minigrid/envs/__pycache__/empty.cpython-36.pyc
- __MACOSX/supplementary_materials/DirPG_code/gym_minigrid/envs/__pycache__/._empty.cpython-36.pyc
- supplementary_materials/DirPG_code/gym_minigrid/envs/__pycache__/empty.cpython-37.pyc
- __MACOSX/supplementary_materials/DirPG_code/gym_minigrid/envs/__pycache__/._empty.cpython-37.pyc
- supplementary_materials/DirPG_code/gym_minigrid/envs/__pycache__/gotoobject.cpython-37.pyc
- __MACOSX/supplementary_materials/DirPG_code/gym_minigrid/envs/__pycache__/._gotoobject.cpython-37.pyc
- supplementary_materials/DirPG_code/gym_minigrid/envs/__pycache__/gotoobject.cpython-36.pyc
- __MACOSX/supplementary_materials/DirPG_code/gym_minigrid/envs/__pycache__/._gotoobject.cpython-36.pyc
- supplementary_materials/DirPG_code/gym_minigrid/envs/__pycache__/memory.cpython-37.pyc
- __MACOSX/supplementary_materials/DirPG_code/gym_minigrid/envs/__pycache__/._memory.cpython-37.pyc
- supplementary_materials/DirPG_code/gym_minigrid/envs/__pycache__/playground_v0.cpython-36.pyc
- __MACOSX/supplementary_materials/DirPG_code/gym_minigrid/envs/__pycache__/._playground_v0.cpython-36.pyc
- supplementary_materials/DirPG_code/gym_minigrid/envs/__pycache__/playground_v0.cpython-37.pyc
- __MACOSX/supplementary_materials/DirPG_code/gym_minigrid/envs/__pycache__/._playground_v0.cpython-37.pyc
- supplementary_materials/DirPG_code/gym_minigrid/envs/__pycache__/memory.cpython-36.pyc
- __MACOSX/supplementary_materials/DirPG_code/gym_minigrid/envs/__pycache__/._memory.cpython-36.pyc
- supplementary_materials/DirPG_code/gym_minigrid/envs/__pycache__/redbluedoors.cpython-37.pyc
- __MACOSX/supplementary_materials/DirPG_code/gym_minigrid/envs/__pycache__/._redbluedoors.cpython-37.pyc
- supplementary_materials/DirPG_code/gym_minigrid/envs/__pycache__/putnear.cpython-37.pyc
- __MACOSX/supplementary_materials/DirPG_code/gym_minigrid/envs/__pycache__/._putnear.cpython-37.pyc
- supplementary_materials/DirPG_code/gym_minigrid/envs/__pycache__/putnear.cpython-36.pyc
- __MACOSX/supplementary_materials/DirPG_code/gym_minigrid/envs/__pycache__/._putnear.cpython-36.pyc
- supplementary_materials/DirPG_code/gym_minigrid/envs/__pycache__/redbluedoors.cpython-36.pyc
- __MACOSX/supplementary_materials/DirPG_code/gym_minigrid/envs/__pycache__/._redbluedoors.cpython-36.pyc
- supplementary_materials/DirPG_code/gym_minigrid/envs/__pycache__/doorkey.cpython-37.pyc
- __MACOSX/supplementary_materials/DirPG_code/gym_minigrid/envs/__pycache__/._doorkey.cpython-37.pyc
- supplementary_materials/DirPG_code/gym_minigrid/envs/__pycache__/doorkey.cpython-36.pyc
- __MACOSX/supplementary_materials/DirPG_code/gym_minigrid/envs/__pycache__/._doorkey.cpython-36.pyc
- supplementary_materials/DirPG_code/gym_minigrid/envs/__pycache__/blockedunlockpickup.cpython-36.pyc
- __MACOSX/supplementary_materials/DirPG_code/gym_minigrid/envs/__pycache__/._blockedunlockpickup.cpython-36.pyc
- supplementary_materials/DirPG_code/gym_minigrid/envs/__pycache__/blockedunlockpickup.cpython-37.pyc
- __MACOSX/supplementary_materials/DirPG_code/gym_minigrid/envs/__pycache__/._blockedunlockpickup.cpython-37.pyc
- supplementary_materials/DirPG_code/gym_minigrid/envs/__pycache__/__init__.cpython-36.pyc
- __MACOSX/supplementary_materials/DirPG_code/gym_minigrid/envs/__pycache__/.___init__.cpython-36.pyc
- supplementary_materials/DirPG_code/gym_minigrid/envs/__pycache__/unlock.cpython-36.pyc
- __MACOSX/supplementary_materials/DirPG_code/gym_minigrid/envs/__pycache__/._unlock.cpython-36.pyc
- supplementary_materials/DirPG_code/gym_minigrid/envs/__pycache__/multiroom.cpython-37.pyc
- __MACOSX/supplementary_materials/DirPG_code/gym_minigrid/envs/__pycache__/._multiroom.cpython-37.pyc
- supplementary_materials/DirPG_code/gym_minigrid/envs/__pycache__/fetch.cpython-36.pyc
- __MACOSX/supplementary_materials/DirPG_code/gym_minigrid/envs/__pycache__/._fetch.cpython-36.pyc
- supplementary_materials/DirPG_code/gym_minigrid/envs/__pycache__/fetch.cpython-37.pyc
- __MACOSX/supplementary_materials/DirPG_code/gym_minigrid/envs/__pycache__/._fetch.cpython-37.pyc
- supplementary_materials/DirPG_code/gym_minigrid/envs/__pycache__/multiroom.cpython-36.pyc
- __MACOSX/supplementary_materials/DirPG_code/gym_minigrid/envs/__pycache__/._multiroom.cpython-36.pyc
- supplementary_materials/DirPG_code/gym_minigrid/envs/__pycache__/__init__.cpython-37.pyc
- __MACOSX/supplementary_materials/DirPG_code/gym_minigrid/envs/__pycache__/.___init__.cpython-37.pyc
- supplementary_materials/DirPG_code/gym_minigrid/envs/__pycache__/unlock.cpython-37.pyc
- __MACOSX/supplementary_materials/DirPG_code/gym_minigrid/envs/__pycache__/._unlock.cpython-37.pyc
- __MACOSX/supplementary_materials/DirPG_code/gym_minigrid/envs/.___pycache__
- supplementary_materials/DirPG_code/gym_minigrid/envs/obstructedmaze.py
- __MACOSX/supplementary_materials/DirPG_code/gym_minigrid/envs/._obstructedmaze.py
- supplementary_materials/DirPG_code/gym_minigrid/envs/playground_v0.py
- __MACOSX/supplementary_materials/DirPG_code/gym_minigrid/envs/._playground_v0.py
- supplementary_materials/DirPG_code/gym_minigrid/envs/unlockpickup.py
- __MACOSX/supplementary_materials/DirPG_code/gym_minigrid/envs/._unlockpickup.py
- supplementary_materials/DirPG_code/gym_minigrid/envs/fourrooms.py
- __MACOSX/supplementary_materials/DirPG_code/gym_minigrid/envs/._fourrooms.py
- supplementary_materials/DirPG_code/gym_minigrid/envs/keycorridor.py
- __MACOSX/supplementary_materials/DirPG_code/gym_minigrid/envs/._keycorridor.py
- supplementary_materials/DirPG_code/gym_minigrid/envs/redbluedoors.py
- __MACOSX/supplementary_materials/DirPG_code/gym_minigrid/envs/._redbluedoors.py
- supplementary_materials/DirPG_code/gym_minigrid/envs/doorkey.py
- __MACOSX/supplementary_materials/DirPG_code/gym_minigrid/envs/._doorkey.py
- __MACOSX/supplementary_materials/DirPG_code/gym_minigrid/._envs
- __MACOSX/supplementary_materials/DirPG_code/._gym_minigrid
- __MACOSX/supplementary_materials/._DirPG_code
- supplementary_materials/.DS_Store
- __MACOSX/supplementary_materials/._.DS_Store
- supplementary_materials/appendices.pdf
- __MACOSX/._supplementary_materials
