# Supplementary material
Source: ML conference proceedings conference paper supplement (https://proceedings.neurips.cc/paper_files/paper/2020/hash/d1e7b08bdb7783ed4fb10abe92c22ffd-Abstract.html)
Supplement: Supplementary file 2 [file d1e7b08bdb7783ed4fb10abe92c22ffd-Supplemental.zip › supplementary_materials/DirPG_code/gym_minigrid/__init__.py]

# Import the envs module so that envs register themselves
import gym_minigrid.envs

# Import wrappers so it's accessible when installing with pip
import gym_minigrid.wrappers
