# Supplementary material
Source: ML conference proceedings conference paper supplement (https://proceedings.neurips.cc/paper_files/paper/2020/hash/d1e7b08bdb7783ed4fb10abe92c22ffd-Abstract.html)
Supplement: Supplementary file 2 [file d1e7b08bdb7783ed4fb10abe92c22ffd-Supplemental.zip › supplementary_materials/DirPG_code/gym_minigrid/envs/__init__.py]

from gym_minigrid.envs.empty import *
from gym_minigrid.envs.doorkey import *
from gym_minigrid.envs.multiroom import *
from gym_minigrid.envs.fetch import *
from gym_minigrid.envs.gotoobject import *
from gym_minigrid.envs.gotodoor import *
from gym_minigrid.envs.putnear import *
from gym_minigrid.envs.lockedroom import *
from gym_minigrid.envs.keycorridor import *
from gym_minigrid.envs.unlock import *
from gym_minigrid.envs.unlockpickup import *
from gym_minigrid.envs.blockedunlockpickup import *
from gym_minigrid.envs.playground_v0 import *
from gym_minigrid.envs.redbluedoors import *
from gym_minigrid.envs.obstructedmaze import *
from gym_minigrid.envs.memory import *
from gym_minigrid.envs.fourrooms import *
