# Supplementary material
Source: ML conference proceedings conference paper supplement (https://proceedings.neurips.cc/paper_files/paper/2020/hash/d1e7b08bdb7783ed4fb10abe92c22ffd-Abstract.html)
Supplement: Supplementary file 2 [file d1e7b08bdb7783ed4fb10abe92c22ffd-Supplemental.zip › supplementary_materials/DirPG_code/gym_minigrid/envs/blockedunlockpickup.py]

from gym_minigrid.minigrid import Ball
from gym_minigrid.roomgrid import RoomGrid
from gym_minigrid.register import register

class BlockedUnlockPickup(RoomGrid):
    """
    Unlock a door blocked by a ball, then pick up a box
    in another room
    """

    def __init__(self, seed=None):
        room_size = 6
        super().__init__(
            num_rows=1,
            num_cols=2,
            room_size=room_size,
            max_steps=16*room_size**2,
            seed=seed
        )

    def _gen_grid(self, width, height):
        super()._gen_grid(width, height)

        # Add a box to the room on the right
        obj, _ = self.add_object(1, 0, kind="box")
        # Make sure the two rooms are directly connected by a locked door
        door, pos = self.add_door(0, 0, 0, locked=True)
        # Block the door with a ball
        color = self._rand_color()
        self.grid.set(pos[0]-1, pos[1], Ball(color))
        # Add a key to unlock the door
        self.add_object(0, 0, 'key', door.color)

        self.place_agent(0, 0)

        self.obj = obj
        self.mission = "pick up the %s %s" % (obj.color, obj.type)

    def step(self, action):
        obs, reward, done, info = super().step(action)

        if action == self.actions.pickup:
            if self.carrying and self.carrying == self.obj:
                reward = self._reward()
                done = True

        return obs, reward, done, info

register(
    id='MiniGrid-BlockedUnlockPickup-v0',
    entry_point='gym_minigrid.envs:BlockedUnlockPickup'
)
