# Supplementary material
Source: ML conference proceedings conference paper supplement (https://proceedings.neurips.cc/paper_files/paper/2020/hash/d1e7b08bdb7783ed4fb10abe92c22ffd-Abstract.html)
Supplement: Supplementary file 2 [file d1e7b08bdb7783ed4fb10abe92c22ffd-Supplemental.zip › supplementary_materials/DirPG_code/gym_minigrid/envs/doorkey.py]

from gym_minigrid.minigrid import *
from gym_minigrid.register import register

class DoorKeyEnv(MiniGridEnv):
    """
    Environment with a door and key, sparse reward
    """

    def __init__(self, size=8):
        super().__init__(
            grid_size=size,
            max_steps=size*size*2 #*10
        )

    def _gen_grid(self, width, height):
        # Create an empty grid
        self.grid = Grid(width, height)

        # Generate the surrounding walls
        self.grid.wall_rect(0, 0, width, height)

        # Place a goal in the bottom-right corner
        self.grid.set(width - 2, height - 2, Goal())

        # Create a vertical splitting wall
        splitIdx = self._rand_int(2, width-2)
        self.grid.vert_wall(splitIdx, 0)

        # Place the agent at a random position and orientation
        # on the left side of the splitting wall
        self.start_pos = self.place_agent(size=(splitIdx, height))

        # Place a door in the wall
        doorIdx = self._rand_int(1, width-2)
        self.grid.set(splitIdx, doorIdx, LockedDoor('yellow'))

        # Place a yellow key on the left side
        self.place_obj(
            obj=Key('yellow'),
            top=(0, 0),
            size=(splitIdx, height)
        )

        self.mission = "use the key to open the door and then get to the goal"

class DoorKeyEnv5x5(DoorKeyEnv):
    def __init__(self):
        super().__init__(size=5)

class DoorKeyEnv6x6(DoorKeyEnv):
    def __init__(self):
        super().__init__(size=6)

class DoorKeyEnv16x16(DoorKeyEnv):
    def __init__(self):
        super().__init__(size=16)

register(
    id='MiniGrid-DoorKey-5x5-v0',
    entry_point='gym_minigrid.envs:DoorKeyEnv5x5'
)

register(
    id='MiniGrid-DoorKey-6x6-v0',
    entry_point='gym_minigrid.envs:DoorKeyEnv6x6'
)

register(
    id='MiniGrid-DoorKey-8x8-v0',
    entry_point='gym_minigrid.envs:DoorKeyEnv'
)

register(
    id='MiniGrid-DoorKey-16x16-v0',
    entry_point='gym_minigrid.envs:DoorKeyEnv16x16'
)
