# Supplementary material
Source: ML conference proceedings conference paper supplement (https://proceedings.neurips.cc/paper_files/paper/2020/hash/d1e7b08bdb7783ed4fb10abe92c22ffd-Abstract.html)
Supplement: Supplementary file 2 [file d1e7b08bdb7783ed4fb10abe92c22ffd-Supplemental.zip › supplementary_materials/DirPG_code/gym_minigrid/envs/gotodoor.py]

from gym_minigrid.minigrid import *
from gym_minigrid.register import register

class GoToDoorEnv(MiniGridEnv):
    """
    Environment in which the agent is instructed to go to a given object
    named using an English text string
    """

    def __init__(
        self,
        size=5
    ):
        assert size >= 5

        super().__init__(
            grid_size=size,
            max_steps=5*size**2,
            # Set this to True for maximum speed
            see_through_walls=True
        )

    def _gen_grid(self, width, height):
        # Create the grid
        self.grid = Grid(width, height)

        # Randomly vary the room width and height
        width = self._rand_int(5, width+1)
        height = self._rand_int(5, height+1)

        # Generate the surrounding walls
        self.grid.wall_rect(0, 0, width, height)

        # Generate the 4 doors at random positions
        doorPos = []
        doorPos.append((self._rand_int(2, width-2), 0))
        doorPos.append((self._rand_int(2, width-2), height-1))
        doorPos.append((0, self._rand_int(2, height-2)))
        doorPos.append((width-1, self._rand_int(2, height-2)))

        # Generate the door colors
        doorColors = []
        while len(doorColors) < len(doorPos):
            color = self._rand_elem(COLOR_NAMES)
            if color in doorColors:
                continue
            doorColors.append(color)

        # Place the doors in the grid
        for idx, pos in enumerate(doorPos):
            color = doorColors[idx]
            self.grid.set(*pos, Door(color))

        # Randomize the agent start position and orientation
        self.place_agent(size=(width, height))

        # Select a random target door
        doorIdx = self._rand_int(0, len(doorPos))
        self.target_pos = doorPos[doorIdx]
        self.target_color = doorColors[doorIdx]

        # Generate the mission string
        self.mission = 'go to the %s door' % self.target_color

    def step(self, action):
        obs, reward, done, info = super().step(action)

        ax, ay = self.agent_pos
        tx, ty = self.target_pos

        # Don't let the agent open any of the doors
        if action == self.actions.toggle:
            done = True

        # Reward performing done action in front of the target door
        if action == self.actions.done:
            if (ax == tx and abs(ay - ty) == 1) or (ay == ty and abs(ax - tx) == 1):
                reward = self._reward()
            done = True

        return obs, reward, done, info

class GoToDoor8x8Env(GoToDoorEnv):
    def __init__(self):
        super().__init__(size=8)

class GoToDoor6x6Env(GoToDoorEnv):
    def __init__(self):
        super().__init__(size=6)

register(
    id='MiniGrid-GoToDoor-5x5-v0',
    entry_point='gym_minigrid.envs:GoToDoorEnv'
)

register(
    id='MiniGrid-GoToDoor-6x6-v0',
    entry_point='gym_minigrid.envs:GoToDoor6x6Env'
)

register(
    id='MiniGrid-GoToDoor-8x8-v0',
    entry_point='gym_minigrid.envs:GoToDoor8x8Env'
)
