# Supplementary material
Source: ML conference proceedings conference paper supplement (https://proceedings.neurips.cc/paper_files/paper/2020/hash/d1e7b08bdb7783ed4fb10abe92c22ffd-Abstract.html)
Supplement: Supplementary file 2 [file d1e7b08bdb7783ed4fb10abe92c22ffd-Supplemental.zip › supplementary_materials/DirPG_code/gym_minigrid/envs/putnear.py]

from gym_minigrid.minigrid import *
from gym_minigrid.register import register

class PutNearEnv(MiniGridEnv):
    """
    Environment in which the agent is instructed to place an object near
    another object through a natural language string.
    """

    def __init__(
        self,
        size=6,
        numObjs=2
    ):
        self.numObjs = numObjs

        super().__init__(
            grid_size=size,
            max_steps=5*size,
            # Set this to True for maximum speed
            see_through_walls=True
        )

    def _gen_grid(self, width, height):
        self.grid = Grid(width, height)

        # Generate the surrounding walls
        self.grid.horz_wall(0, 0)
        self.grid.horz_wall(0, height-1)
        self.grid.vert_wall(0, 0)
        self.grid.vert_wall(width-1, 0)

        # Types and colors of objects we can generate
        types = ['key', 'ball', 'box']

        objs = []
        objPos = []

        def near_obj(env, p1):
            for p2 in objPos:
                dx = p1[0] - p2[0]
                dy = p1[1] - p2[1]
                if abs(dx) <= 1 and abs(dy) <= 1:
                    return True
            return False

        # Until we have generated all the objects
        while len(objs) < self.numObjs:
            objType = self._rand_elem(types)
            objColor = self._rand_elem(COLOR_NAMES)

            # If this object already exists, try again
            if (objType, objColor) in objs:
                continue

            if objType == 'key':
                obj = Key(objColor)
            elif objType == 'ball':
                obj = Ball(objColor)
            elif objType == 'box':
                obj = Box(objColor)

            pos = self.place_obj(obj, reject_fn=near_obj)

            objs.append((objType, objColor))
            objPos.append(pos)

        # Randomize the agent start position and orientation
        self.place_agent()

        # Choose a random object to be moved
        objIdx = self._rand_int(0, len(objs))
        self.move_type, self.moveColor = objs[objIdx]
        self.move_pos = objPos[objIdx]

        # Choose a target object (to put the first object next to)
        while True:
            targetIdx = self._rand_int(0, len(objs))
            if targetIdx != objIdx:
                break
        self.target_type, self.target_color = objs[targetIdx]
        self.target_pos = objPos[targetIdx]

        self.mission = 'put the %s %s near the %s %s' % (
            self.moveColor,
            self.move_type,
            self.target_color,
            self.target_type
        )

    def step(self, action):
        preCarrying = self.carrying

        obs, reward, done, info = super().step(action)

        u, v = self.dir_vec
        ox, oy = (self.agent_pos[0] + u, self.agent_pos[1] + v)
        tx, ty = self.target_pos

        # If we picked up the wrong object, terminate the episode
        if action == self.actions.pickup and self.carrying:
            if self.carrying.type != self.move_type or self.carrying.color != self.moveColor:
                done = True

        # If successfully dropping an object near the target
        if action == self.actions.drop and preCarrying:
            if self.grid.get(ox, oy) is preCarrying:
                if abs(ox - tx) <= 1 and abs(oy - ty) <= 1:
                    reward = self._reward()
            done = True

        return obs, reward, done, info

class PutNear8x8N3(PutNearEnv):
    def __init__(self):
        super().__init__(size=8, numObjs=3)

register(
    id='MiniGrid-PutNear-6x6-N2-v0',
    entry_point='gym_minigrid.envs:PutNearEnv'
)

register(
    id='MiniGrid-PutNear-8x8-N3-v0',
    entry_point='gym_minigrid.envs:PutNear8x8N3'
)
