# Supplementary material
Source: ML conference proceedings conference paper supplement (https://proceedings.neurips.cc/paper_files/paper/2020/hash/d1e7b08bdb7783ed4fb10abe92c22ffd-Abstract.html)
Supplement: Supplementary file 2 [file d1e7b08bdb7783ed4fb10abe92c22ffd-Supplemental.zip › supplementary_materials/DirPG_code/gym_minigrid/register.py]

from gym.envs.registration import register as gym_register

env_list = []

def register(
    id,
    entry_point,
    reward_threshold=900
):
    assert id.startswith("MiniGrid-")
    assert id not in env_list

    # Register the environment with OpenAI gym
    gym_register(
        id=id,
        entry_point=entry_point,
        reward_threshold=reward_threshold
    )

    # Add the environment to the set
    env_list.append(id)
