# Supplementary material
Source: ML conference proceedings conference paper supplement (https://proceedings.neurips.cc/paper_files/paper/2020/hash/d1e7b08bdb7783ed4fb10abe92c22ffd-Abstract.html)
Supplement: Supplementary file 2 [file d1e7b08bdb7783ed4fb10abe92c22ffd-Supplemental.zip › supplementary_materials/DirPG_code/gym_minigrid/rendering.py]

import numpy as np
from PyQt5.QtCore import Qt
from PyQt5.QtGui import QImage, QPixmap, QPainter, QColor, QPolygon
from PyQt5.QtCore import QPoint, QSize, QRect
from PyQt5.QtWidgets import QApplication, QMainWindow, QWidget
from PyQt5.QtWidgets import QHBoxLayout, QVBoxLayout, QLabel, QFrame

class Window(QMainWindow):
    """
    Simple application window to render the environment into
    """

    def __init__(self):
        super().__init__()

        self.setWindowTitle('MiniGrid Gym Environment')

        self.imgLabel = QLabel()
        self.imgLabel.setFrameStyle(QFrame.Panel | QFrame.Sunken)

        # Arrange widgets horizontally
        hbox = QHBoxLayout()
        hbox.addStretch(1)
        hbox.addWidget(self.imgLabel)
        hbox.addStretch(1)

        # Create a main widget for the window
        mainWidget = QWidget(self)
        self.setCentralWidget(mainWidget)
        mainWidget.setLayout(hbox)

        # Show the application window
        self.show()
        self.setFocus()

        self.closed = False

        # Callback for keyboard events
        self.keyDownCb = None

    def closeEvent(self, event):
        self.closed = True

    def setPixmap(self, pixmap):
        self.imgLabel.setPixmap(pixmap)

    def setKeyDownCb(self, callback):
        self.keyDownCb = callback

    def keyPressEvent(self, e):
        if self.keyDownCb == None:
            return

        keyName = None
        if e.key() == Qt.Key_Left:
            keyName = 'LEFT'
        elif e.key() == Qt.Key_Right:
            keyName = 'RIGHT'
        elif e.key() == Qt.Key_Up:
            keyName = 'UP'
        elif e.key() == Qt.Key_Down:
            keyName = 'DOWN'
        elif e.key() == Qt.Key_Space:
            keyName = 'SPACE'
        elif e.key() == Qt.Key_Return:
            keyName = 'RETURN'
        elif e.key() == Qt.Key_Alt:
            keyName = 'ALT'
        elif e.key() == Qt.Key_Control:
            keyName = 'CTRL'
        elif e.key() == Qt.Key_PageUp:
            keyName = 'PAGE_UP'
        elif e.key() == Qt.Key_PageDown:
            keyName = 'PAGE_DOWN'
        elif e.key() == Qt.Key_Backspace:
            keyName = 'BACKSPACE'
        elif e.key() == Qt.Key_Escape:
            keyName = 'ESCAPE'

        if keyName == None:
            return
        self.keyDownCb(keyName)

class Renderer:
    def __init__(self, width, height, ownWindow=False):
        self.width = width
        self.height = height

        self.img = QImage(width, height, QImage.Format_RGB888)
        self.painter = QPainter()

        self.window = None
        if ownWindow:
            self.app = QApplication([])
            self.window = Window()

    def close(self):
        """
        Deallocate resources used
        """
        pass

    def beginFrame(self):
        self.painter.begin(self.img)
        self.painter.setRenderHint(QPainter.Antialiasing, False)

        # Clear the background
        self.painter.setBrush(QColor(0, 0, 0))
        self.painter.drawRect(0, 0, self.width - 1, self.height - 1)

    def endFrame(self):
        self.painter.end()

        if self.window:
            if self.window.closed:
                self.window = None
            else:
                self.window.setPixmap(self.getPixmap())
                self.app.processEvents()

    def getPixmap(self):
        return QPixmap.fromImage(self.img)

    def getArray(self):
        """
        Get a numpy array of RGB pixel values.
        The size argument should be (3,w,h)
        """

        width = self.width
        height = self.height
        shape = (width, height, 3)

        numBytes = self.width * self.height * 3
        buf = self.img.bits().asstring(numBytes)
        output = np.frombuffer(buf, dtype='uint8')
        output = output.reshape(shape)

        return output

    def push(self):
        self.painter.save()

    def pop(self):
        self.painter.restore()

    def rotate(self, degrees):
        self.painter.rotate(degrees)

    def translate(self, x, y):
        self.painter.translate(x, y)

    def scale(self, x, y):
        self.painter.scale(x, y)

    def setLineColor(self, r, g, b, a=255):
        self.painter.setPen(QColor(r, g, b, a))

    def setColor(self, r, g, b, a=255):
        self.painter.setBrush(QColor(r, g, b, a))

    def setLineWidth(self, width):
        pen = self.painter.pen()
        pen.setWidthF(width)
        self.painter.setPen(pen)

    def drawLine(self, x0, y0, x1, y1):
        self.painter.drawLine(x0, y0, x1, y1)

    def drawCircle(self, x, y, r):
        center = QPoint(x, y)
        self.painter.drawEllipse(center, r, r)

    def drawPolygon(self, points):
        """Takes a list of points (tuples) as input"""
        points = map(lambda p: QPoint(p[0], p[1]), points)
        self.painter.drawPolygon(QPolygon(points))

    def fillRect(self, x, y, width, height, r, g, b, a=255):
        self.painter.fillRect(QRect(x, y, width, height), QColor(r, g, b, a))
