# Supplementary material
Source: ML conference proceedings conference paper supplement (https://proceedings.neurips.cc/paper_files/paper/2020/hash/d1e7b08bdb7783ed4fb10abe92c22ffd-Abstract.html)
Supplement: Supplementary file 2 [file d1e7b08bdb7783ed4fb10abe92c22ffd-Supplemental.zip › supplementary_materials/DirPG_code/requirements.txt]

torch
gym
jupyter
tensorboard
matplotlib
JSAnimation
PyQt5
