# Supplementary material
Source: ML conference proceedings conference paper supplement (https://proceedings.neurips.cc/paper_files/paper/2020/hash/d1e7b08bdb7783ed4fb10abe92c22ffd-Abstract.html)
Supplement: Supplementary file 2 [file d1e7b08bdb7783ed4fb10abe92c22ffd-Supplemental.zip › supplementary_materials/DirPG_code/run.py]

from scripts.direct_astar import DirectAstar
from scripts.reinforce import Reinforce
from scripts import plots
from scripts.policy_model import Checkpoint

import pathlib
import argparse
import os
import torch
import time
from torch.utils.tensorboard import SummaryWriter

parser = argparse.ArgumentParser()

parser.add_argument('--env_path', type=str, default='MiniGrid-MultiRoom-N6-v0',
                    help='path of minigrid enviornment, should start with "MiniGrid"')

parser.add_argument('--method', type=str, default='direct_astar',
                    help='rl method- direct_astar, cross_entropy, reinforce, reinforce_baseline ')

parser.add_argument('--independent_sampling',action='store_true',
                    help='sample independent trajectories, otherwise, search for candidates')

parser.add_argument('--model_dir', type=str, default='saved_models',
                    help='path of pytorch state dicts for saving and loading')

parser.add_argument('--save_path', type=str, default=None,
                    help='path of pytorch state dicts for saving after training') #policy_state_dicts_multiroom.pkl

parser.add_argument('--load_path', type=str, default=None,
                    help='path of pytorch state dicts for loading before training or playing')

parser.add_argument('--log_path', type=str, default='log.pkl',
                    help='path of log (dictionary)')

parser.add_argument('--run_name', type=str, default='',
                    help='run name for tensorboard')

parser.add_argument('--train', action='store_true',
                    help='train the model (continue from last checkpoint if load_path exist )')

parser.add_argument('--candidates_experiment', action='store_true',
                    help='run the candidates experiment )')

parser.add_argument('--episodes', type=int, default=3000,
                    help='number of training episodes')

parser.add_argument('--eps_reward', type=float, default=1.0,
                    help='priority = gumbel + eps_reward * reward')

parser.add_argument('--eps_grad', type=float, default=1.0,
                    help='gradient = 1/eps_grad * [grad(t_opt) - grad(t_direct)]')

parser.add_argument('--discount', type=float, default=0.999,
                    help='rewards discount factor')

parser.add_argument('--alpha', type=float, default=0.2,
                    help='priority: max-gumbel + return + alpha*upper_bound')

parser.add_argument('--action_level',action='store_true',
                    help='optimize REINFORCE with variance reduction trick')

parser.add_argument('--max_steps', type=float, default=100,
                    help='max trajectory length')

parser.add_argument('--max_interactions', type=float, default=3000,
                    help='max interactions allowed with the enviornment')

parser.add_argument('--max_search_time', type=float, default=30,
                    help='max time in seconds of one t_direct search (priority queue) ')

parser.add_argument('--early_stop',action='store_true',
                    help='stop t_direct search if priority(t_direct)>priority(t_opt)')

parser.add_argument('--mixed_search_strategy',action='store_true',
                    help='for half interactions search in a BFS manner and the rest in a DFS (if dfs_like is true, the order is changing) ')

parser.add_argument('--dfs_like',action='store_true',
                    help='sample a full trajectory before popping the next node from the queue')

parser.add_argument('--seed', type=int, default=0,
                    help='random seed')

parser.add_argument('--play',action='store_true',
                    help='let the policy-model play games in a row')

args = parser.parse_args()

pathlib.Path('logs').mkdir(exist_ok=True)
runame = args.method + ' '
runame += 'alpha = {:.2f}'.format(args.alpha) if args.method == 'direct_astar' else ''
args.run_name = runame if args.run_name == '' else args.run_name
unique = "_{}".format(time.strftime("%Y%m%dT%H%M%S"))
args.run_name = os.path.join(args.run_name, unique)

def main():

    logger = SummaryWriter(os.path.join('logs', args.run_name))

    cp = Checkpoint(folder_path=args.model_dir,
                    load_path=args.load_path,
                    save_path=args.save_path)
                    
    m = DirectAstar(env_path=args.env_path,
                    chekpoint=cp,
                    seed=args.seed,
                    logger=logger,
                    independent_sampling=args.independent_sampling,
                    discount=args.discount,
                    alpha=args.alpha,
                    eps_grad=args.eps_grad,
                    eps_reward=args.eps_reward,
                    max_steps=args.max_steps,
                    max_interactions=args.max_interactions,
                    mixed_search_strategy=args.mixed_search_strategy,
                    dfs_like=args.dfs_like,
                    max_search_time=args.max_search_time,
                    keep_searching=not args.early_stop)

    if args.method == 'direct_astar':
        m.optimization_method = 'direct'
    
    elif args.method == 'cross_entropy':
        m.optimization_method = 'CE'
    
    elif args.method == 'reinforce':
        m = Reinforce(env_path=args.env_path,
                      chekpoint=cp,
                      logger=logger,
                      seed=args.seed,
                      action_level=args.action_level,
                      discount=args.discount,
                      max_interactions=args.max_interactions,
                      max_steps=args.max_steps)


    if args.candidates_experiment:
        m.train(num_episodes=args.episodes,seed=args.seed)
        m.collect_data_candidates_direct_returns()
        m.log['args'] = args
        path = os.path.join('logs',args.log_path)
        torch.save(m.log, path)

        alphas = [0, 1, 2, 3, 4, 5, -1]

        plots.plot_hist_candidates_direct([m.log], alphas)

    if args.train:
        m.train(num_episodes=args.episodes,seed=args.seed)
        m.log['args'] = args
        path = os.path.join('logs',args.log_path)
        torch.save(m.log, path)
    if args.play:
        m.play(seed = args.seed+9999,inarow=True,auto=True)

if __name__ == '__main__':
    main()
