# Supplementary material
Source: ML conference proceedings conference paper supplement (https://proceedings.neurips.cc/paper_files/paper/2020/hash/d1e7b08bdb7783ed4fb10abe92c22ffd-Abstract.html)
Supplement: Supplementary file 2 [file d1e7b08bdb7783ed4fb10abe92c22ffd-Supplemental.zip › supplementary_materials/DirPG_code/scripts/minigrid_rl.py]

import torch
import numpy as np
import gym
from gym_minigrid.register import env_list
import time
import sys

import scripts.utils as utils
import scripts.policy_model as pm

class MinigridRL:
    def __init__(self, env_path, chekpoint, seed, max_steps=120, max_interactions=1000, discount = 0.99):
        self.set_seed(seed)
        self.env_path = env_path
        self.max_steps = max_steps
        self.env = self.reset()
        
        self.num_actions = self.env.action_space.n
        self.max_interactions = max_interactions
        self.discount = discount
        self.target_reward = 100
        
        policy = pm.Policy(self.num_actions)
        self.policy = utils.use_gpu(policy)
        self.optimizer = torch.optim.Adam(self.policy.parameters(), lr=0.001)
        self.cp = chekpoint
        self.log = {}
        try:
            self.load_checkpoint()
        except Exception as e:
            print('failed to load policy ',e)
            print('trying again')
        self.map_actions = ['left','right','forward','pickup','drop','toggle','done']

    def run_episode(self,actions_list,seed):
        """Interacts with the environment given actions """
        rewards = 0
        done = False
        success = False
        self.env.seed(seed)
        state = self.env.reset()
        for action in actions_list:
            state, reward, done,info = self.env.step(action)
            if done and reward == self.target_reward:
                success = True
            rewards += reward
        return rewards,success
            
    def train(self):
        pass

    def reset(self):
        env = gym.make(self.env_path)
        env.max_steps =self.max_steps
        return env

    def set_seed(self, seed):
        np.random.seed(seed)
        torch.manual_seed(seed)

    def load_checkpoint(self, filepath=None):
        if filepath is not None:
            self.cp.load_path = filepath
        self.cp.load(self.policy, self.optimizer)

    def save_checkpoint(self,filepath=None):
        if filepath is not None:
            self.cp.save_path = filepath
        self.cp.save(self.policy,self.optimizer)
    
    def play(self,actions,seed,auto = False):
        renderer = self.env.render('human')
        self.env.seed(seed)
        state = self.env.reset()
        done = False
        total_reward = 0
        it = iter(actions)

        def keyDownCb(keyName):
            nonlocal it,total_reward,done
            if keyName == 'ESCAPE':
                sys.exit(0)
            elif keyName == 'SPACE' and not auto:
                action = it.__next__()
            else:
                print("unknown key %s" % keyName)
                return
            obs, reward, done, info = self.env.step(action)
            total_reward += reward
            print_log(action,reward)

        def print_log(action,reward):
            print ('step:{} action: {}, reward: {:.2f}'.format(self.env.step_count,self.map_actions[action],reward))
            if done:
                print('done with total reward: ',total_reward)
        
        #if not auto:
        renderer.window.setKeyDownCb(keyDownCb)
        if auto:
            for action in actions:
                obs, reward, done, info = self.env.step(action)
                self.env.render('human')
                time.sleep(0.1)
                total_reward += reward
                print_log(action,reward)        
        while True:
            self.env.render('human')
            time.sleep(0.1)
            # If the window was closed
            if renderer.window == None or done:
                break
