# Supplementary material
Source: ML conference proceedings conference paper supplement (https://proceedings.neurips.cc/paper_files/paper/2020/hash/d1e7b08bdb7783ed4fb10abe92c22ffd-Abstract.html)
Supplement: Supplementary file 2 [file d1e7b08bdb7783ed4fb10abe92c22ffd-Supplemental.zip › supplementary_materials/DirPG_code/scripts/utils.py]

import numpy as np
import torch

def sample_gumbel(mu):
    """Sample a Gumbel(mu)."""    
    return -np.log(np.random.exponential()) + mu


def sample_truncated_gumbel(mu, b):
    """Sample a Gumbel(mu) truncated to be less than b."""    
    return -np.log(np.random.exponential() + np.exp(-b + mu)) + mu

  
def sample_gumbel_argmax(logits):
    """Sample from a softmax distribution over logits.

    TODO: check this is correct.

    Args:
    logits: A flat numpy array of logits.

    Returns:
    A sample from softmax(logits).
    """
    phi_x_g = -np.log(np.random.exponential(size=logits.shape)) + logits
    argmax = np.argmax(phi_x_g)
    return phi_x_g,argmax


def logsumexp(logits):
    c = np.max(logits)
    return np.log(np.sum(np.exp(logits - c))) + c


def log_softmax(logits, axis=1):
    """Normalize logits per row so that they are logprobs.
  
      TODO: check this is correct. 
    """
    maxes = np.max(logits, axis=axis, keepdims=True)
    offset_logits = logits - maxes
    log_zs = np.log(np.sum(np.exp(offset_logits), axis=axis, keepdims=True))
    return offset_logits - log_zs

def use_gpu(x):
    if torch.cuda.is_available():
        x = x.cuda()
    return x
